# Supplementary material
Source: Research Square preprint supplement (doi:10.21203/rs.3.rs-9166684/v1)
Supplement: Supplementary file 1 [file 75b3a3fbe931a47f9de32343.docx]

**SUPPORTING INFORMATION FOR**

| 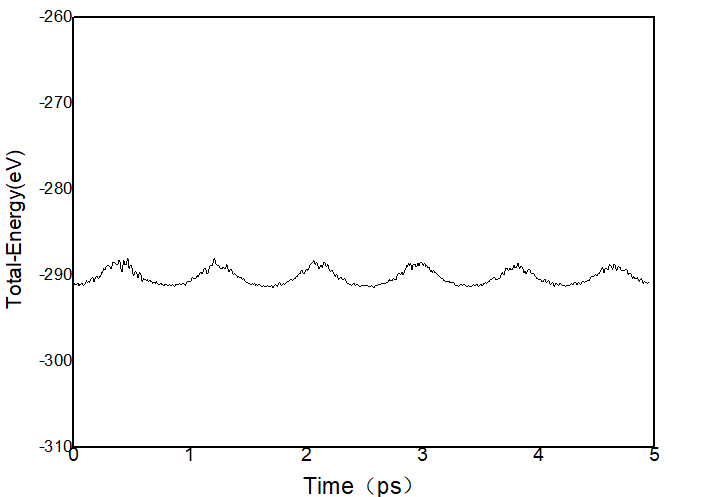 | 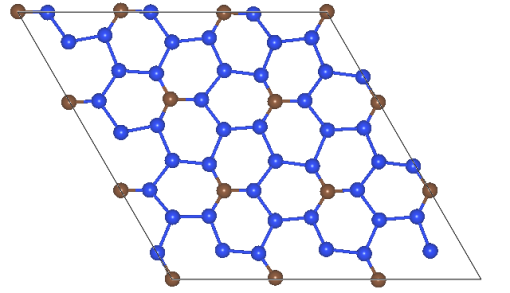 |
| --- | --- |
| (a) | |
| 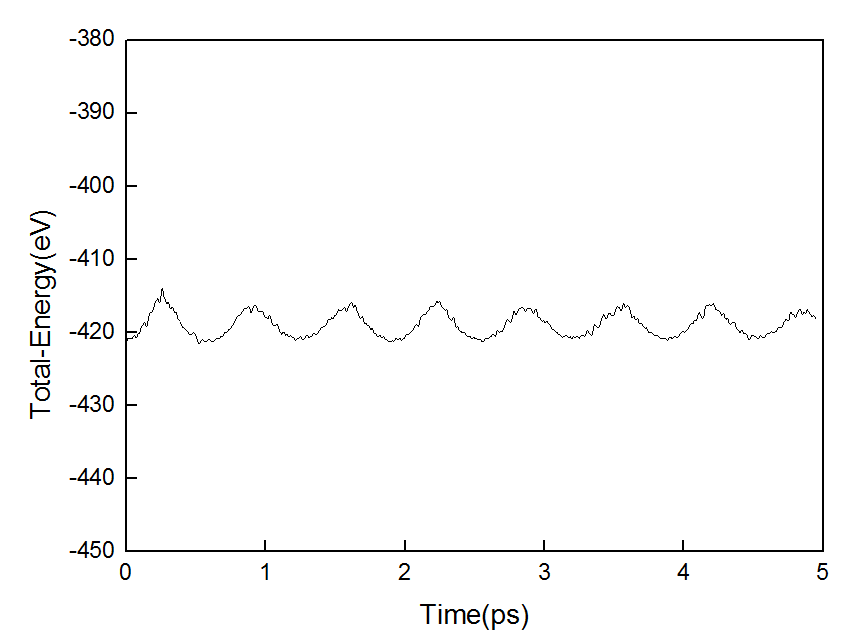 | 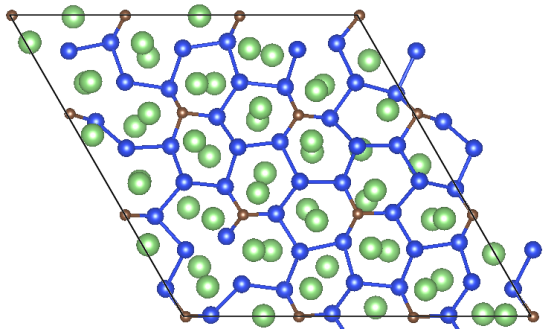 |
| (b) | |
| 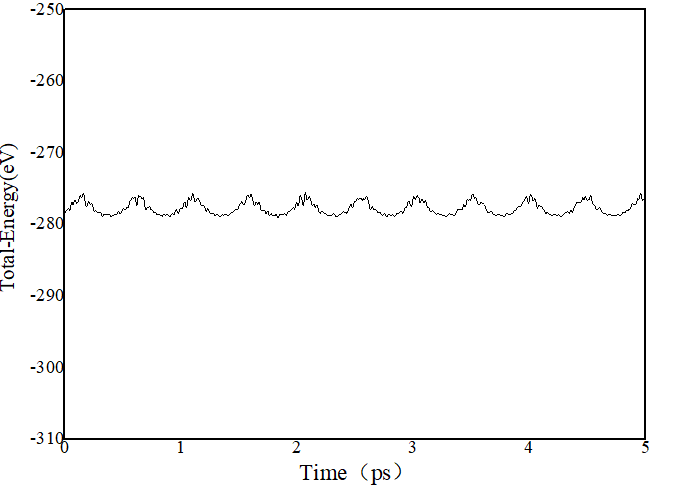 | 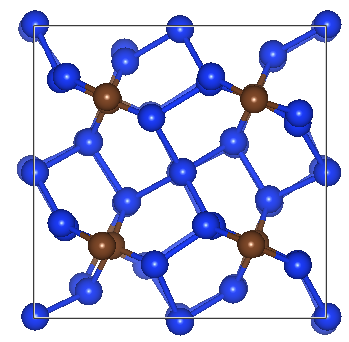 |
| (c) | |
| 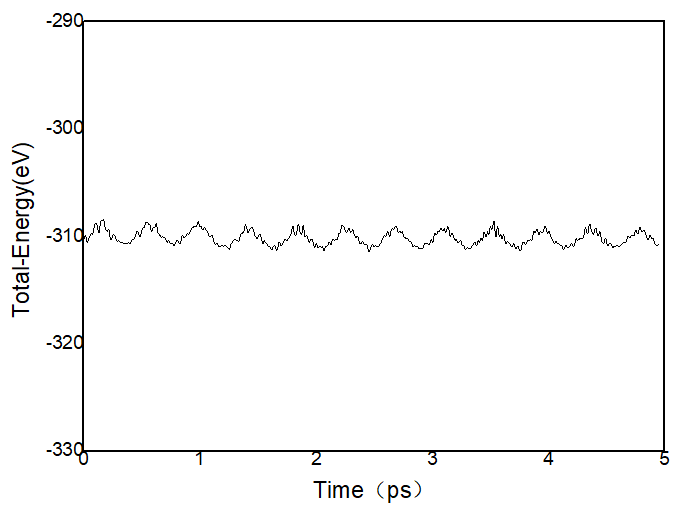 | 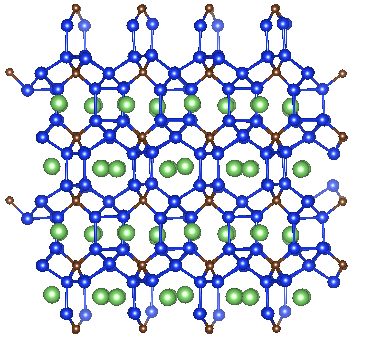 |
| (d) | |

Figure S1. AIMD simulations of (a)2D Si5C, (b) 2D Li6Si5C , (c)3D Si5C, (d)3D Li2Si5C, The brown, blue, and green balls represent C, Si, and Li, respectively.

| 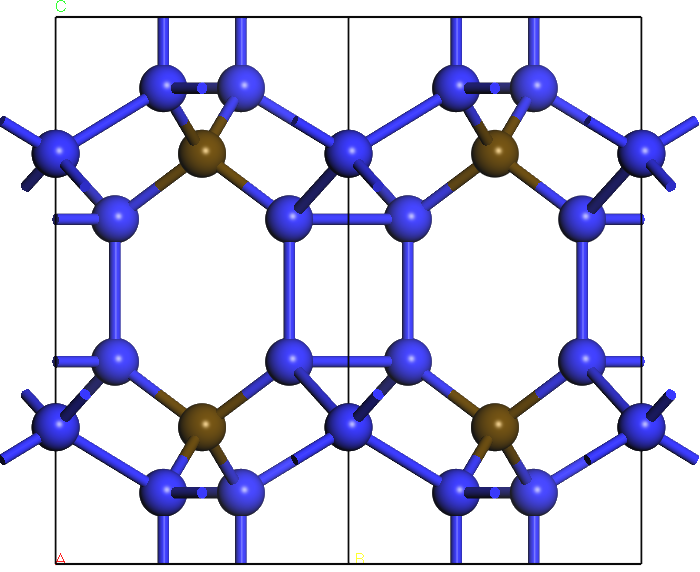 | 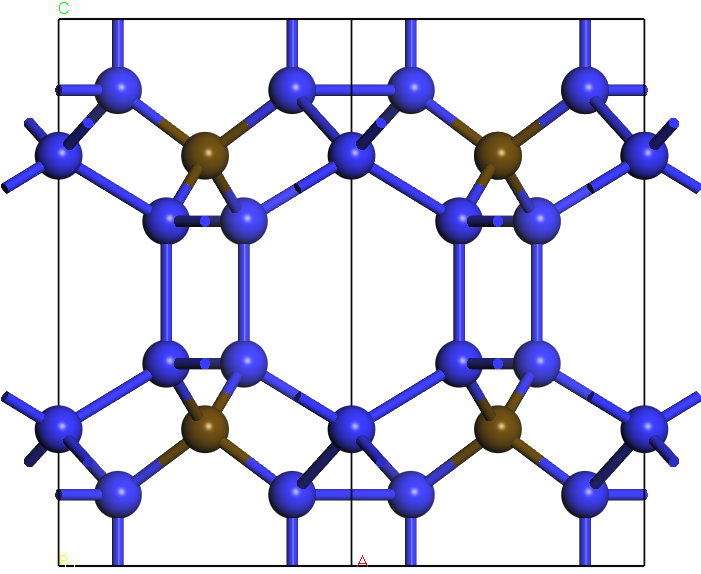 | 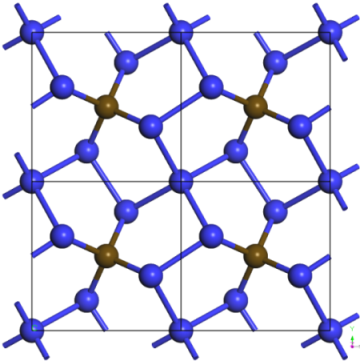 |
| --- | --- | --- |
| (a) | (b) | (c) |

Figure S2 The views of 3D Si5C along (a) axis a, (b) axis b, (c) axis c (2×2×1supercell)

| 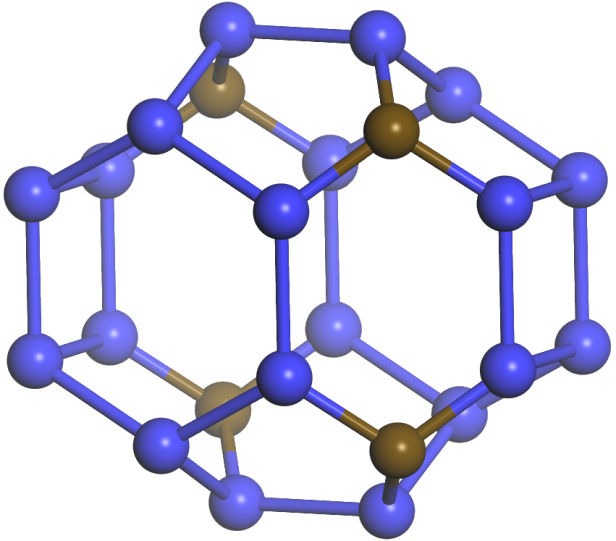 | 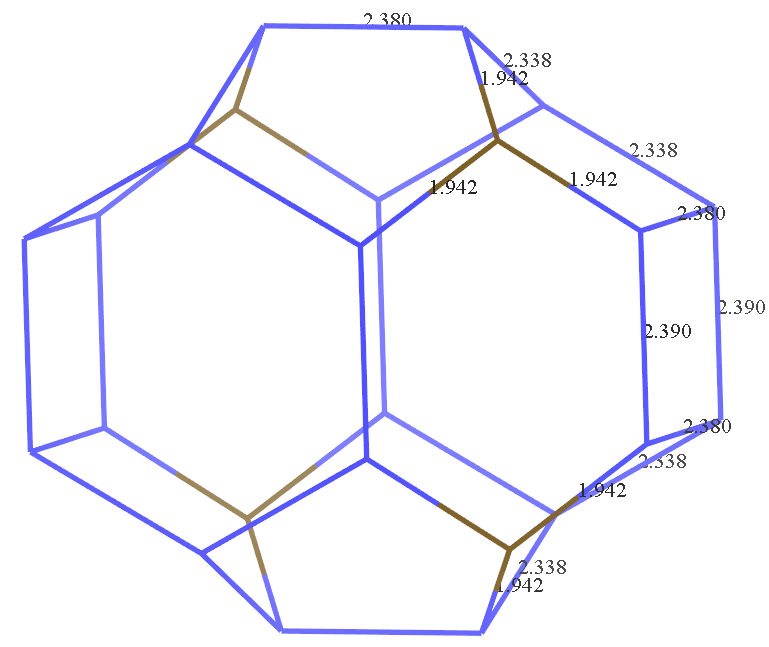 |
| --- | --- |
| 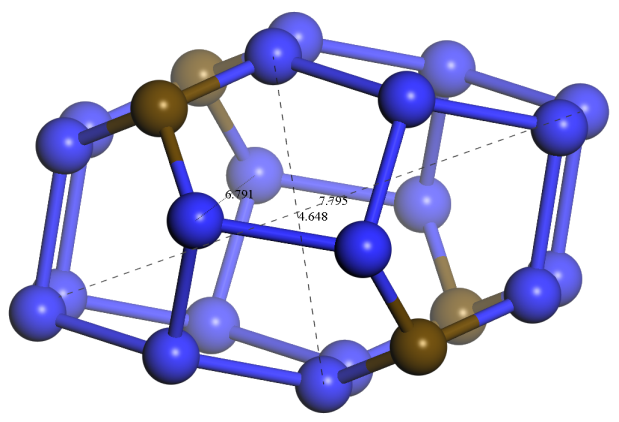 | 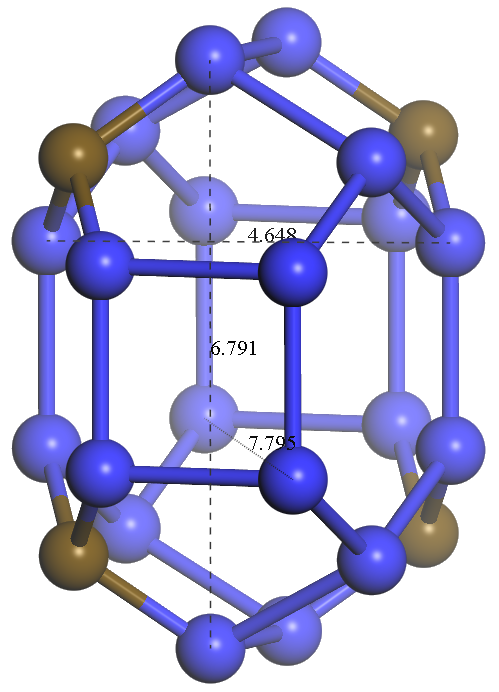 |

Figure S3 Various side views of porous structure of 3D Si5C

| 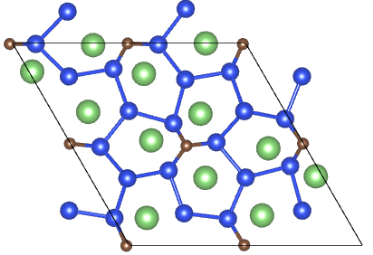 | 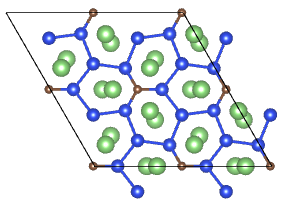 | 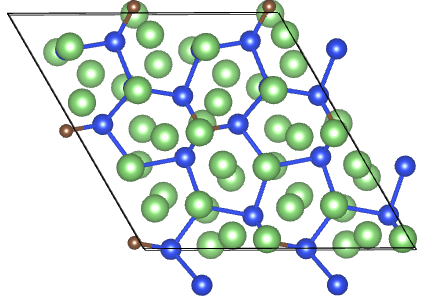 |
| --- | --- | --- |
| 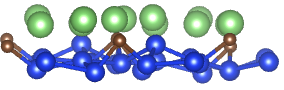 | 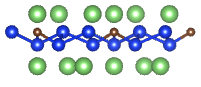 | 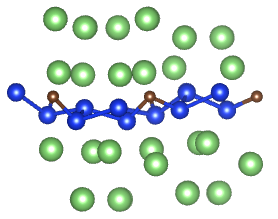 |
| (a) | (b) | (c) |
|  | | |

Figure S4 Top view and side view of absorbed (a) 12Li, (b) 24Li, (c) 48Li on the surface of 2D Si5C

| 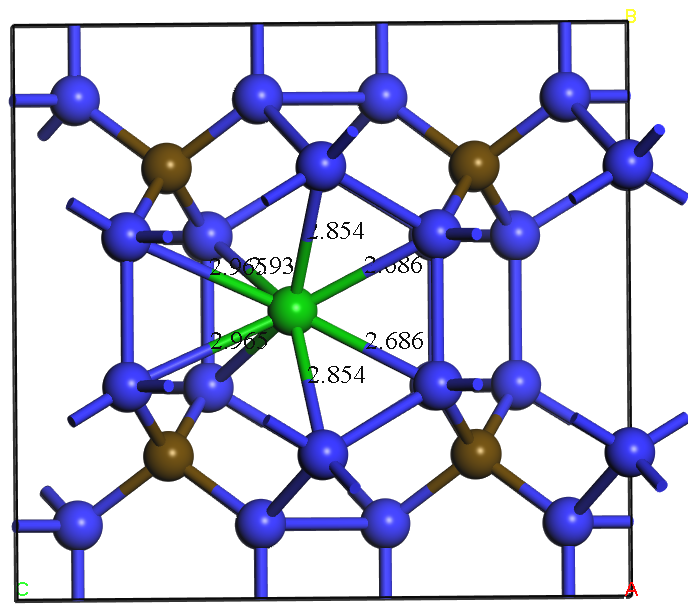 | 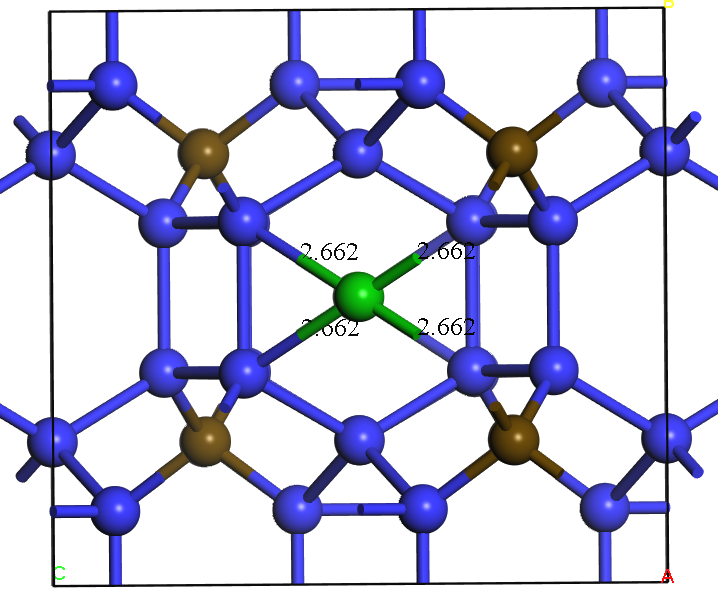 |
| --- | --- |
| 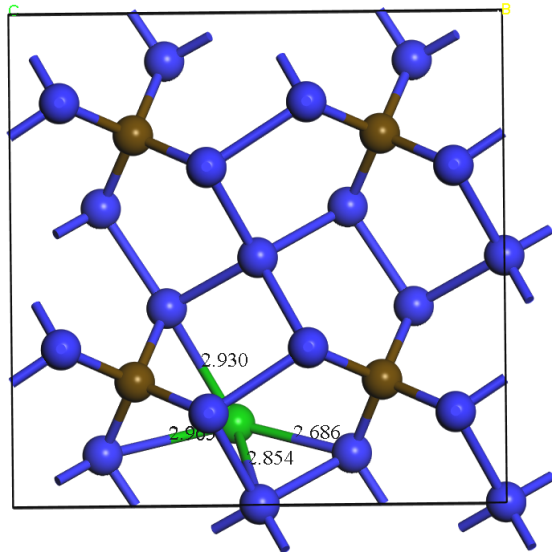 | 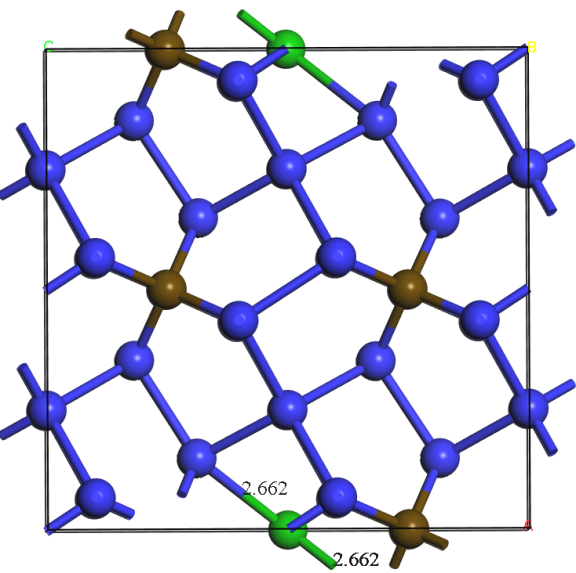 |
| (a) | (b) |

Figure S5 The views of two possible sites with single Li intercalated into 3D Si5C along axis b and axis c (a) site-1 (b) site-2

| 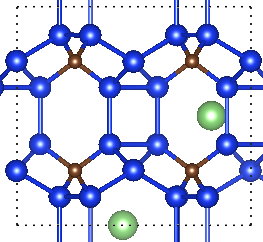 | 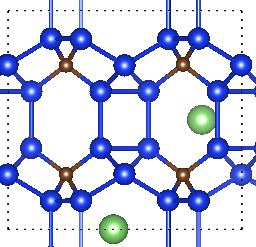 | 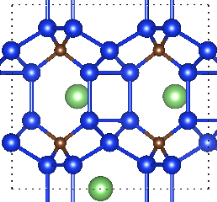 | 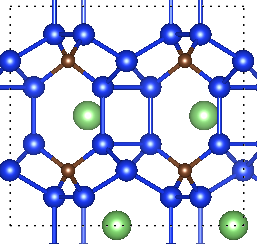 |
| --- | --- | --- | --- |
| 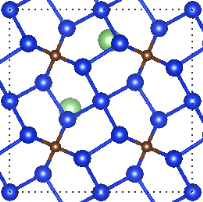 | 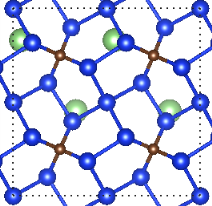 | 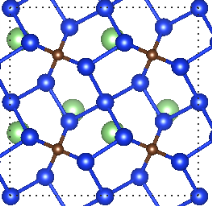 | 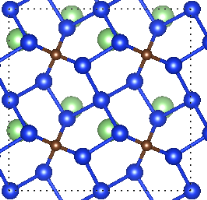 |
| (a) Li0.25Si5C | (b) Li0.5Si5C | (c) Li0.75Si5C | (d) LiSi5C |
| 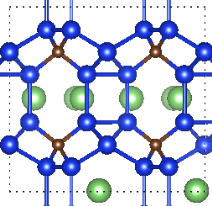 | 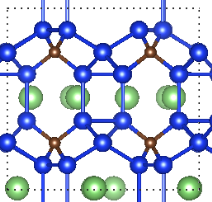 | 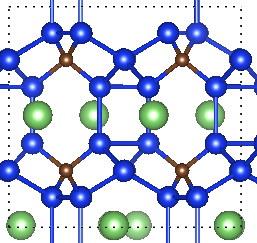 | 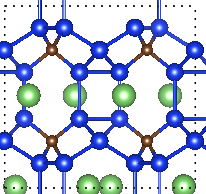 |
| 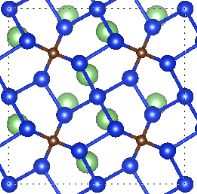 | 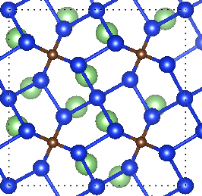 | 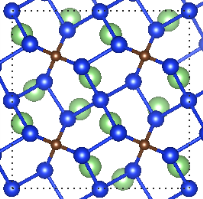 | 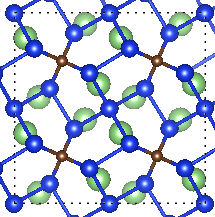 |
| (e) Li1.25Si5C | (f) Li1.5Si5C | (g) Li1.75Si5C | (h) Li2Si5C |

Figure S6 Top and side view of intercalated 1~8Li((a)~(h)) into 3D Si5C (2 × 2× 1supercell)

| 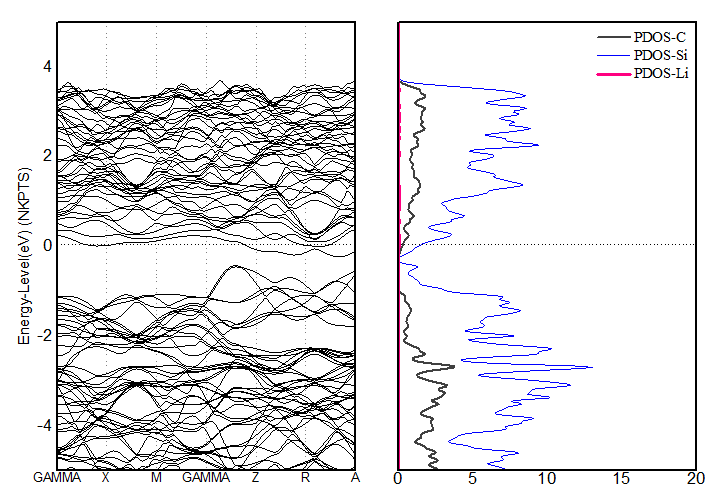 | 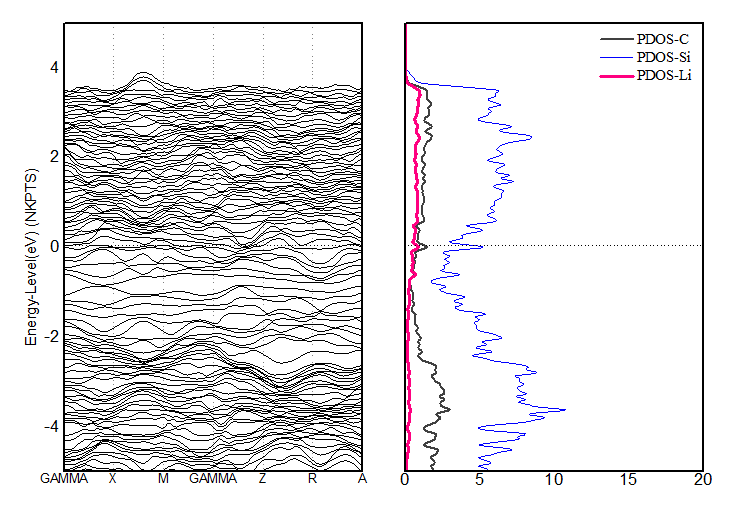 |
| --- | --- |
| (a) | (b) |

Figure S7 Band structure and DOS for the most stable configuration of 1Li-intercalated and fully Li-intercalated 3D Si5C(a)Li0.25Si5C,(b)Li2Si5C.

| Table S1. The structure parameters of 2D and 3D porous SiC5 | | | |
| --- | --- | --- | --- |
| Name  (Space group) | Lattic parameter | Bond length (Å) | Bond angle（deg） |
| 2D Si5C  (No. 157) | a=b=6.258Å α=β=90° γ=120° | dSi-Si:2.262  dSi−C:1.809 | ∠Si-C-Si:120; ∠C-Si-Si:125  ∠Si-Si-Si (bonded to Si):118  ∠Si-Si-Si ( bonded to C):106 |
| 3D porous Si5C  (No.84) | a=b=4.916 Å  c=9.181Å α=β=γ=90° | dSi-Si:2.338, 2.379, 2.390  dSi-C: 1.942 | ∠Si-C-Si:109 (5-numbered ring); 111（6-numbered ring）  ∠C-Si-Si:108,117(5–numbered ring);125(6-numbered ring)  ∠Si-Si-Si:90 (4-numbered ring); 94,103 (5-numbered ring); 118,124 (6-numbered ring) |

| Table S2. the CM5 charges of Si, C, and Li and bond orders for 2D Si5C absorbed Li | | | | | | | | |
| --- | --- | --- | --- | --- | --- | --- | --- | --- |
|  | | Si | C | Li | Si−C | Si−Si | Li−C | Li−Si |
| Si5C | | 0.40 | -0.59 |  | 1.25 | 0.07~1.16 |  |  |
| -0.30 |  |  |  |  |  |  |
| Si5C-1Li(site-a) | | 0.19~0.40 | -0.56 | 0.65 | 1.23~1.28 | 0.06~1.26 | 0.00 | 0.13 |
| -0.29 | -0.60 |  |  |  |  | 0.11 |
| Si5C-1Li(site-b) | | 0.24 | -0.67 | 0.72 | 1.24 | 1.19 | 0.09 | 0.10 |
| -0.44 |  |  |  |  |  | 0.07 |
| Si5C-1Li(site-c) | | 0.22~0.38 | -0.75 | 0.72 | 1.09~1.30 | 0.99 | 0.12 | 0.11 |
| -0.48 | -0.61 |  |  |  |  | 0.07 |
| Si5C-24Li | | -0.31 | -0.88 | 0.65 | 0.49 | 0.98 | 0.16 | 0.19 |
| -0.80 |  | 0.49 |  | 0.23 |  | 0.22 |

| Table S3. the CM5 charges of Si, C, and Li and bond orders for 3D Si5C intercalated Li | | | | | | |
| --- | --- | --- | --- | --- | --- | --- |
|  | Si | C (Li) | Si−C | Si-Si(C−C) | Li−C | Li−Si |
| Si5C | 0.14 | -0.40 | 0.86 | 0.75~0.89 |  |  |
| -0.15 |  |  |  |  |  |
| Li0.25Si5C | 0.02~0.10 | -0.39 | 0.86~0.89 | 0.74~0.91 | 0.01 | 0.09 |
| -0.24 | (0.64) |  |  |  | 0.06 |
| Li2Si5C | -0.04~-0.59 | -0.30~ -0.52  (0.60~0.66) | 0.83~1.16 | 0.62~0.95 | 0.01~ 0.10 | 0.01~0.16 |
